# Supplementary material
Source: Springer Nature journal article supplement (https://www.springermedizin.de/resource/supplementary/12889_2008_1221_MOESM4_ESM.pdf/9502720)

**Events/1,000 patients/year**

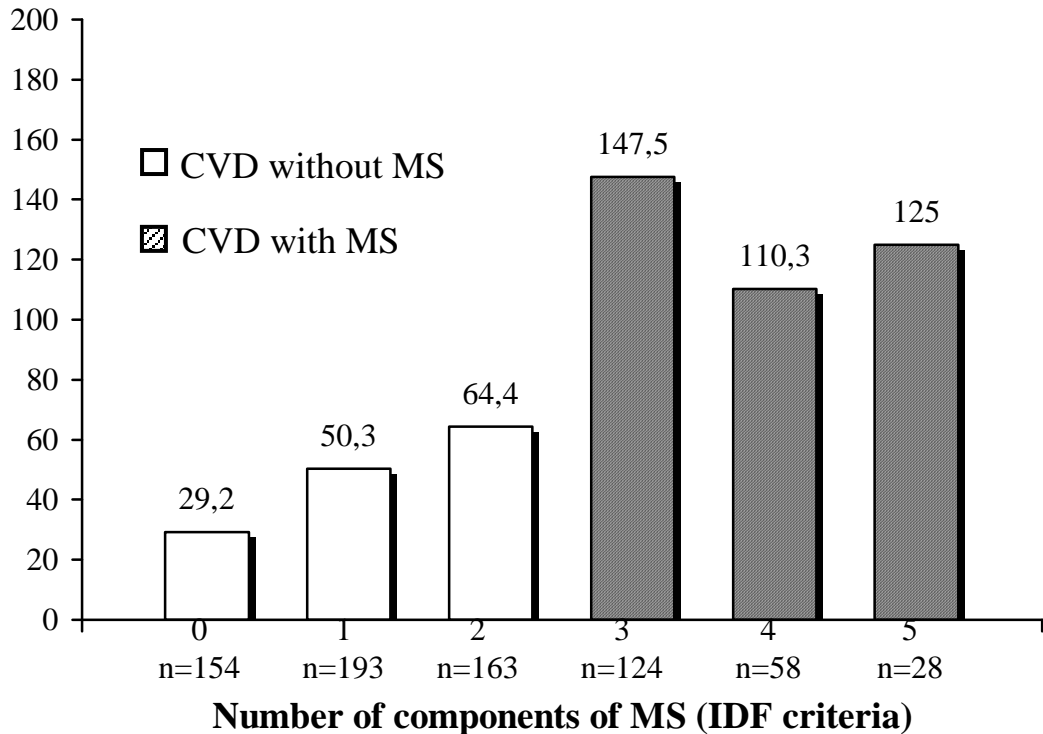

Supplement: MOESM4 [file 9502720]
